# Supplementary figures and images for: Anti-Tumor Effect of Turandot Proteins Induced via the JAK/STAT Pathway in the mxc Hematopoietic Tumor Mutant in Drosophila
Source: MDPI journal article supplement (doi:10.3390/cells12162047), 2023-08-11

Figure S1

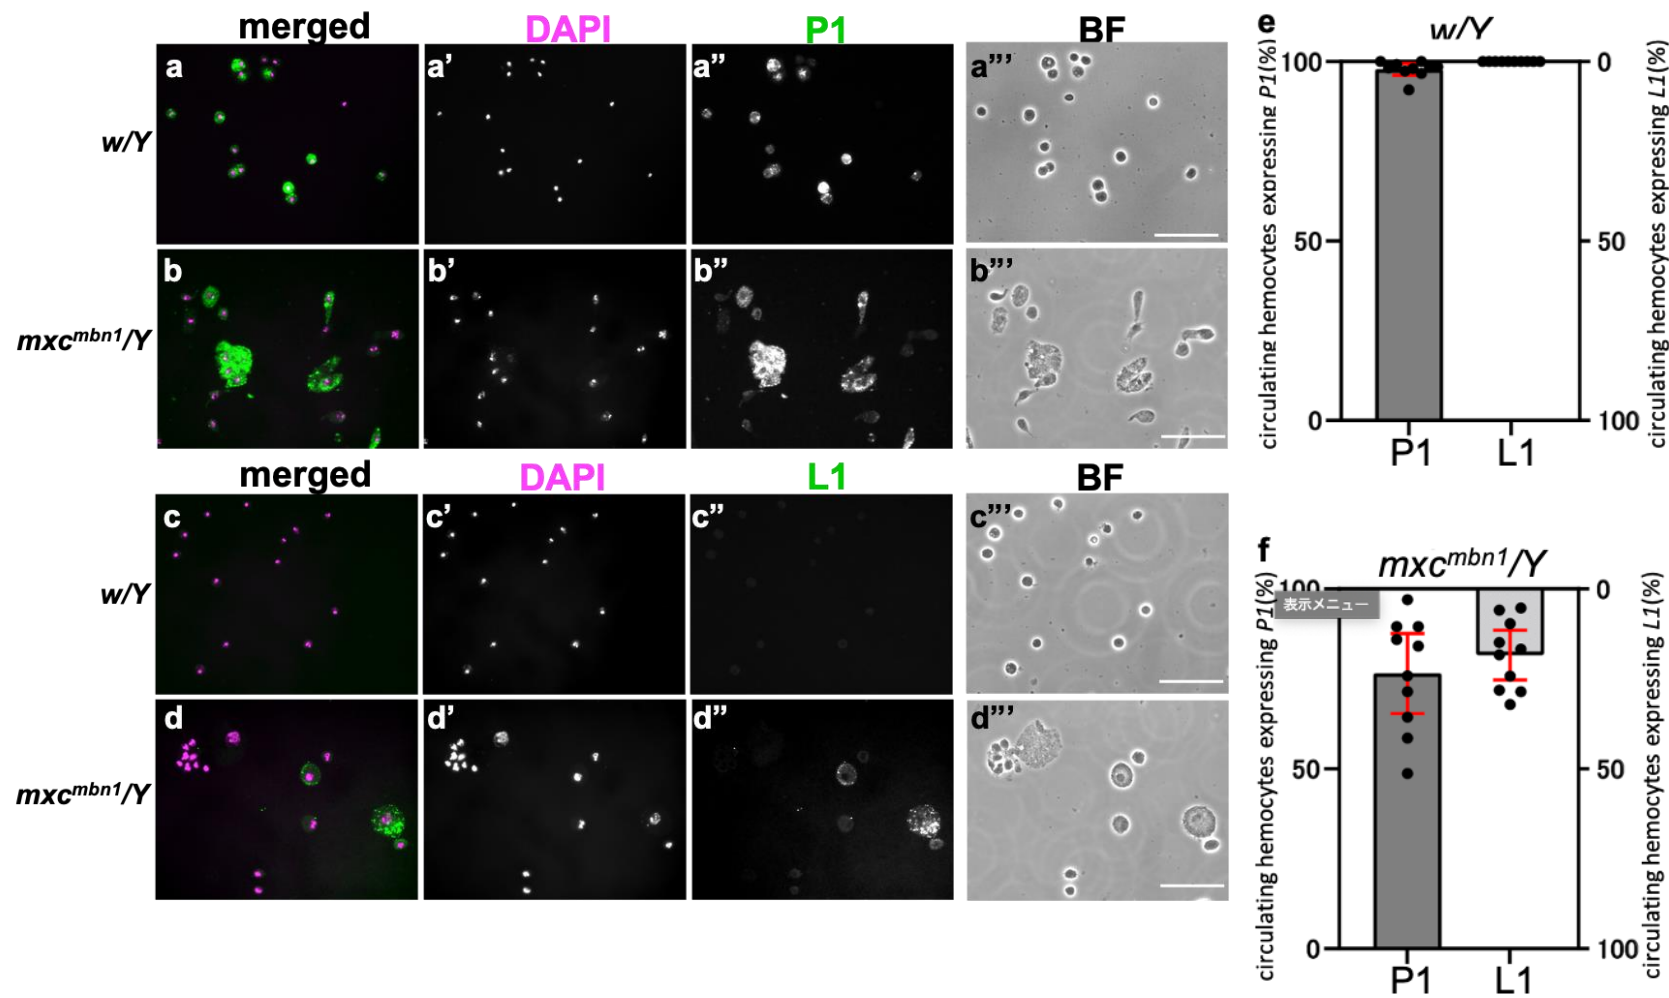

Figure S2

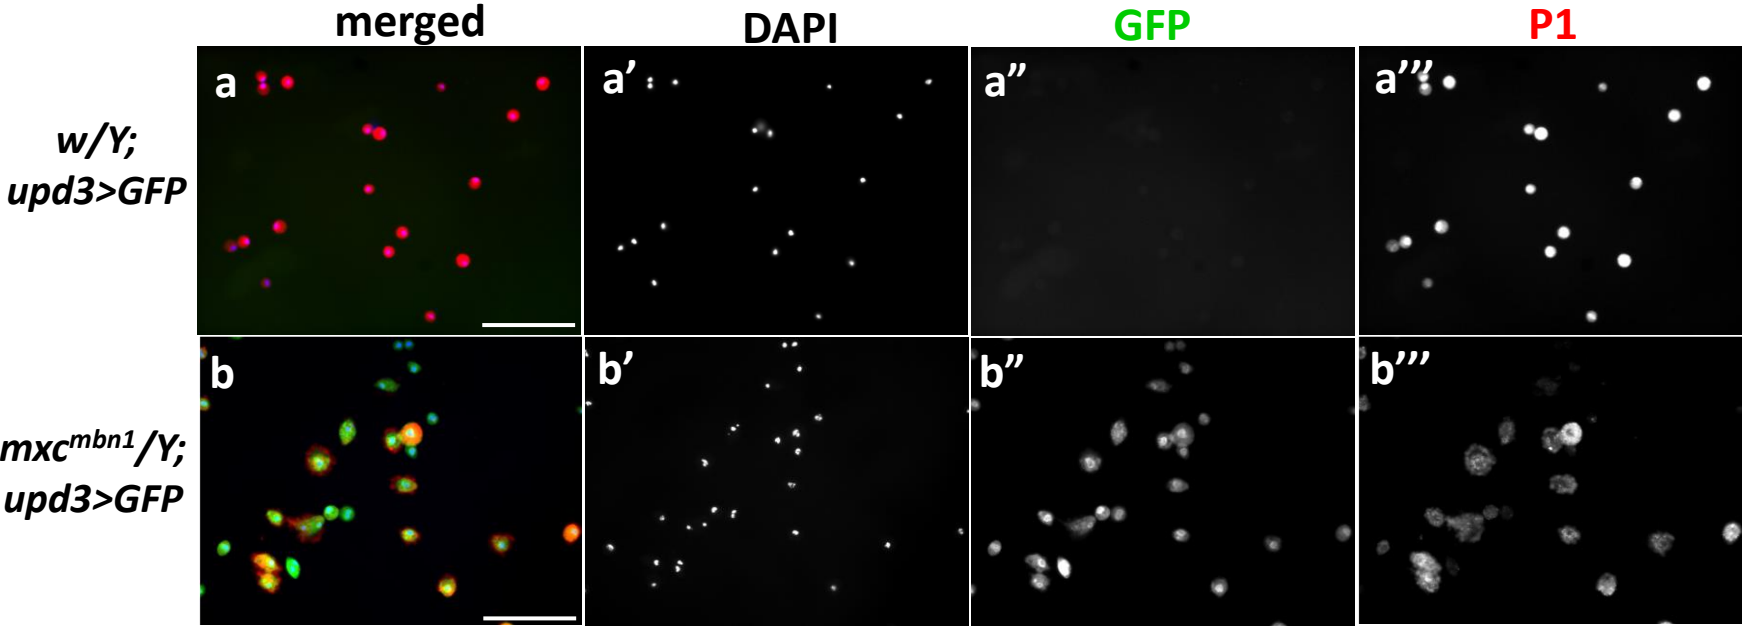

Figure S3

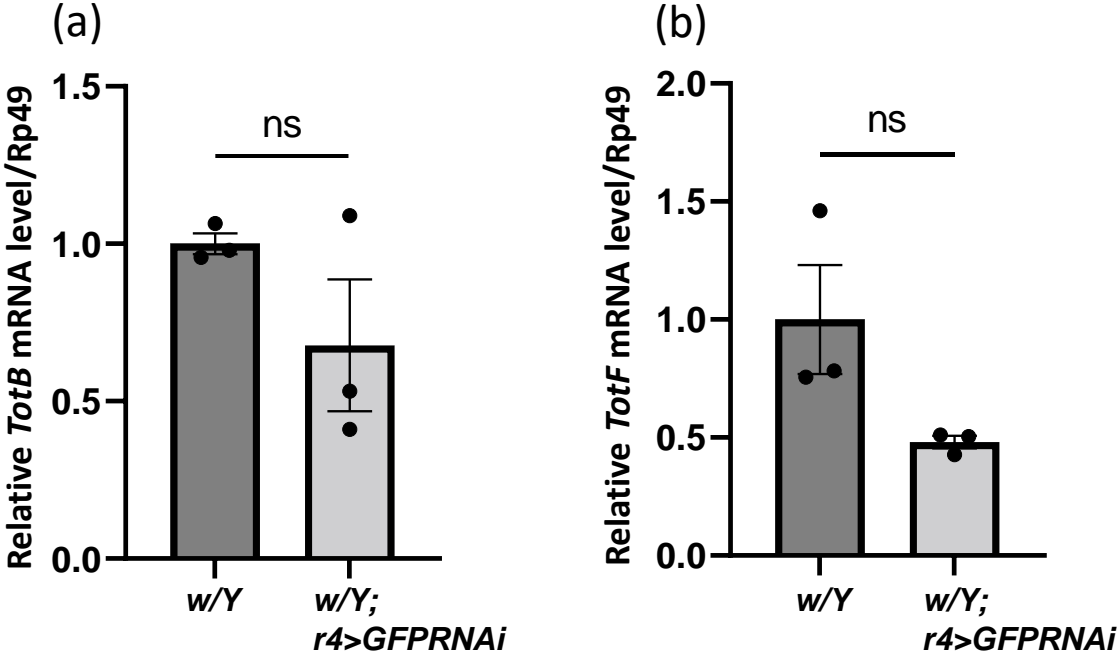

Figure S4

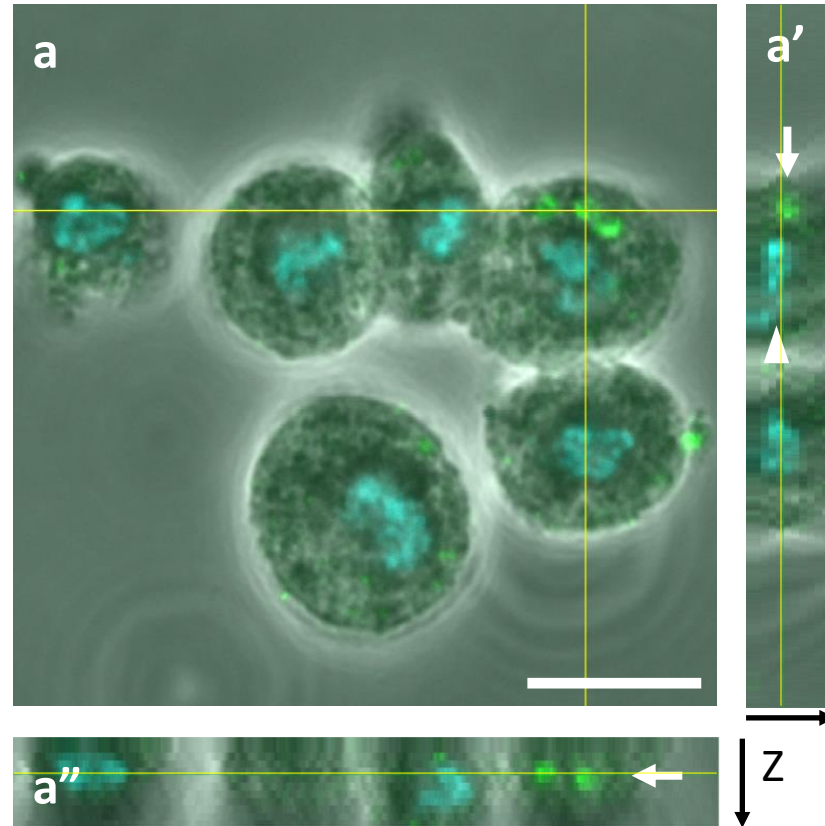

## Figure S5

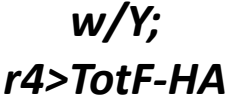

***mxcm<sup>mbn1</sup>/Y;***  
***r4>TotF-HA***

**merged**

DAPI

# HA

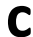

**\*\***

Supplement: s1 [file s1]
